# Supplementary material for: Two-dimensional conductive metal–organic frameworks with dual metal sites toward the electrochemical oxygen evolution reaction
Source: Royal Society of Chemistry journal article supplement (doi:10.1039/d0ta10870g), 2020-12-10
Supplement: d0ta10870g1.pdf [file d0ta10870g1.pdf]

**Electronic Supplementary Information**

**Two-Dimensional Conductive Metal-Organic Frameworks with Dual  
Metal Sites toward Electrochemical Oxygen Evolution Reaction**

Jiawen Li, Peng Liu, Jianxin Mao, Jianyue Yan, Wenbo Song\*

*College of Chemistry, Jilin University, Changchun 130012, P.R. China.*

*\*E-mail: wbsong@jlu.edu.cn*

**Contents:**

|                                                    |    |
|----------------------------------------------------|----|
| <b>1. Experimental Section</b> .....               | 2  |
| <b>2. <sup>1</sup>H NMR and MALDI-TOF MS</b> ..... | 3  |
| <b>3. FT-IR Spectra</b> .....                      | 4  |
| <b>4. PXRD Measurements</b> .....                  | 5  |
| <b>5. SEM Images</b> .....                         | 6  |
| <b>6. TEM Images</b> .....                         | 7  |
| <b>7. XPS Spectra</b> .....                        | 9  |
| <b>8. ECSA Measurements</b> .....                  | 11 |
| <b>9. TOF calculation</b> .....                    | 12 |
| <b>10. Band Structure Calculations</b> .....       | 13 |
| <b>11. Stability Test</b> .....                    | 14 |
| <b>12. Comparison Table</b> .....                  | 15 |

## 1. Experimental Section

**TOF calculation:** The TOF values were estimated according to the following formula:<sup>123</sup>

$$\text{TOF} = \frac{\text{number of total oxygen turnovers / cm}^2}{\text{number of active sites / cm}^2}$$

The number of total oxygen turnovers was calculated from the current density by the following equation:

$$\text{Number of O}_2 = \left( J \frac{\text{mA}}{\text{cm}^2} \right) \left( \frac{1 \text{ C s}^{-1}}{1000 \text{ mA}} \right) \left( \frac{1 \text{ mol e}^-}{96485.3 \text{ C}} \right) \left( \frac{1 \text{ mol O}_2}{4 \text{ mol e}^-} \right) \left( \frac{6.022 * 10^{23} \text{ O}_2 \text{ molecules}}{1 \text{ mol O}_2} \right) = 1.56 * 10^{15} \frac{\text{O}_2/\text{s}}{\text{cm}^2} \text{ per } \frac{\text{mA}}{\text{cm}^2}$$

The number of active sites was regarded as the number of surface sites (Ni atoms are regarded as possible active sites), and calculated by the following formula:

$$\text{Nuber of active sites} = \left( \frac{\text{number of Ni atoms / unit cell}}{\text{Volume / unit cell}} \right)^{\frac{2}{3}}$$

Finally, the plot of current density can be converted into a TOF plot according to the following formula:

$$\text{TOF} = \frac{\left( 1.56 * 10^{15} \frac{\text{O}_2}{\text{cm}^2} \text{ per } \frac{\text{mA}}{\text{cm}^2} \right) * |J|}{\text{Number of active sites} * A_{\text{ECSA}}}$$

The  $A_{\text{ECSA}}$  is the electrochemical active surface area, which can be calculated from the following formula, where specific capacitance is  $C_{\text{dl}}$ , and  $40 \mu\text{F}$  is a constant to convert capacitance to  $A_{\text{ECSA}}$ :

$$A_{\text{ECSA}} = \frac{\text{specific capacitance}}{40 \mu\text{F cm}^{-2} \text{ per cm}_{\text{ECSA}}^2}$$

**D-band center Analysis:** The d-band center ( $\varepsilon_d$ ) was calculated according to following equation:<sup>4</sup>

$$\varepsilon_d = \frac{\int N(\varepsilon) \varepsilon d\varepsilon}{N(\varepsilon) d\varepsilon}$$

Where  $N(\varepsilon)$  is the d-band DOS,  $\varepsilon$  is the energy. The integration was set in the whole range of d-band DOS.

## 2. $^1\text{H}$ NMR and MALDI-TOF MS

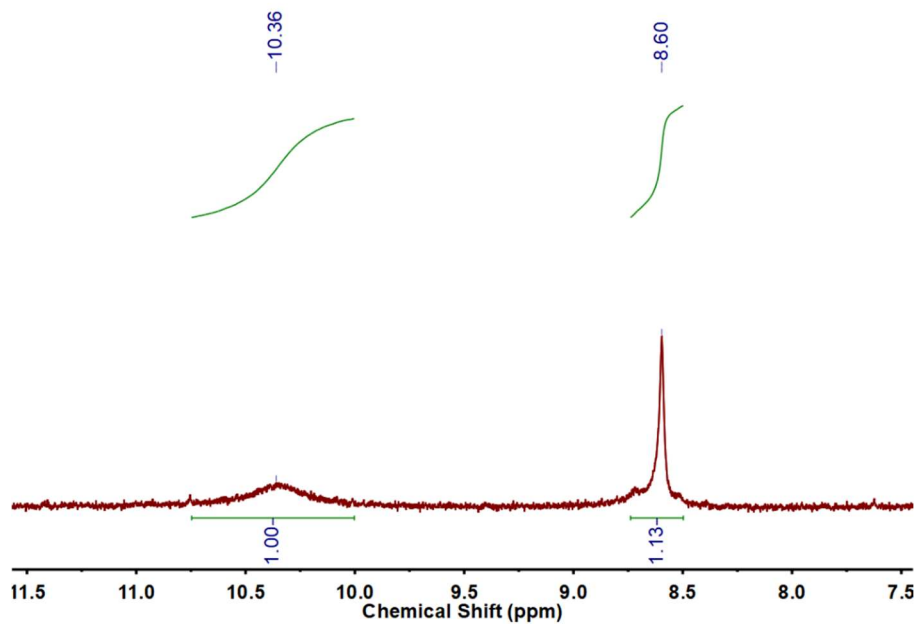

Figure S1.  $^1\text{H}$  NMR spectra of NiPc.

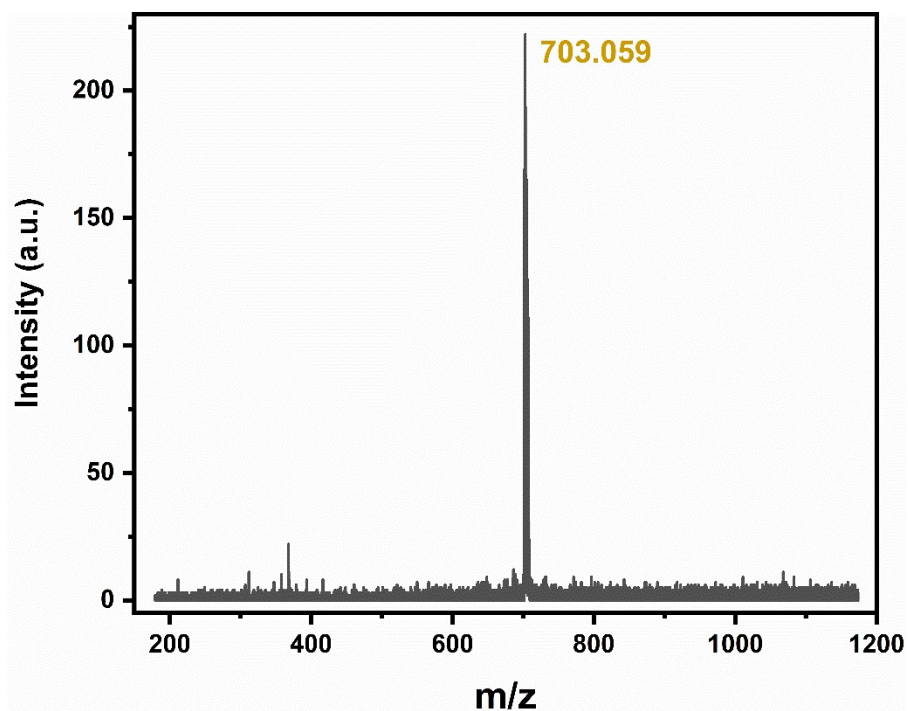

Figure S2. MALDI-TOF MS spectra of ZnPc.

### 3. FT-IR Spectra

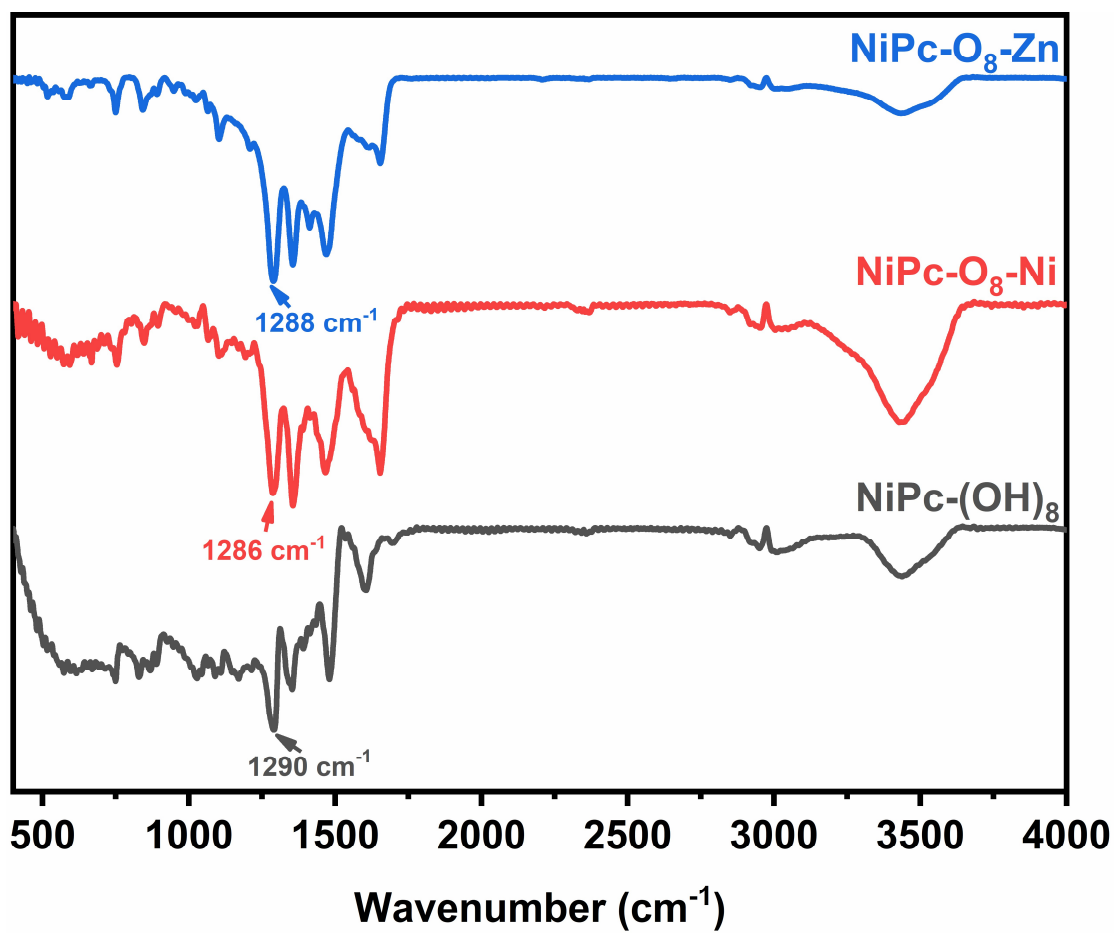

Figure S3. FT-IR spectra of NiPc, NiPc-Ni and NiPc-Zn.

## 4. PXRD Measurements

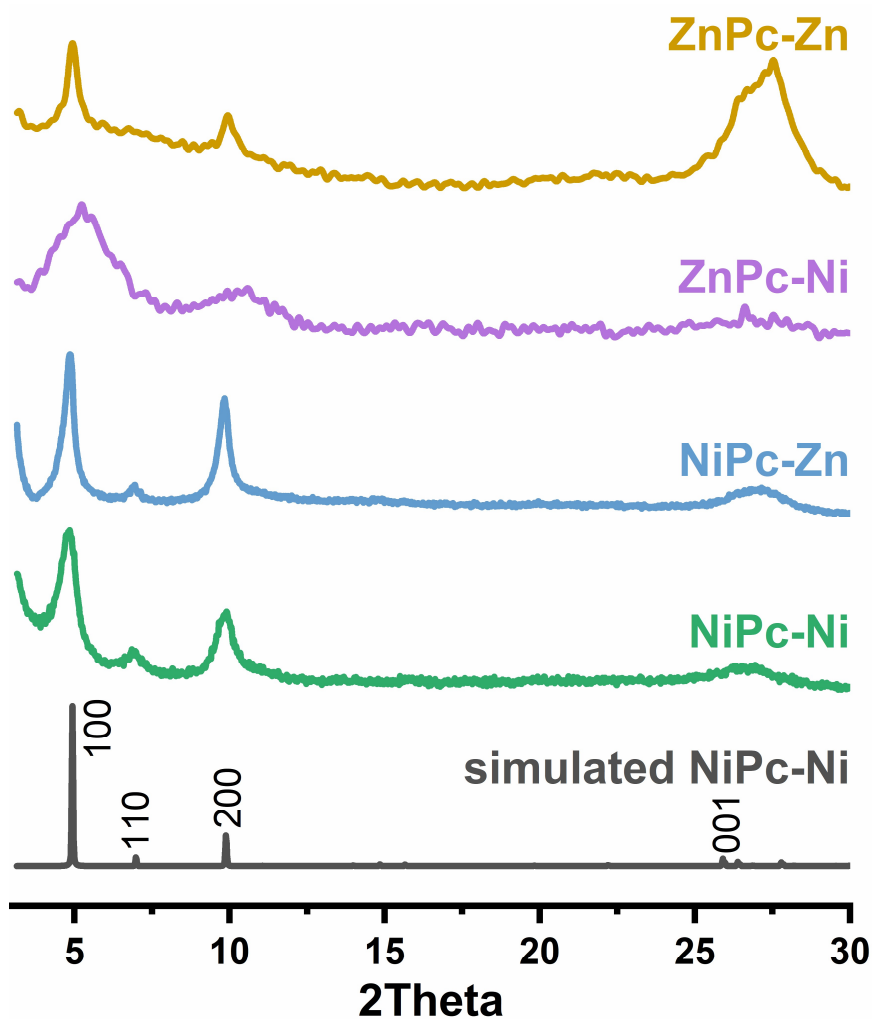

Figure S4. PXRD patterns of NiPc-Ni, NiPc-Zn, ZnPc-Ni and ZnPc-Zn.

Table S1. Lattice parameters of MPc-M' MOFs

| Lattice parameters | NiPc-Ni | NiPc-Zn | ZnPc-Ni | ZnPc-Zn |
|--------------------|---------|---------|---------|---------|
| a (Å)              | 17.8963 | 17.9504 | 17.9396 | 17.9936 |
| b (Å)              | 17.8963 | 17.9504 | 17.9396 | 17.9936 |
| c (Å)              | 3.4372  | 3.4317  | 3.4337  | 3.4283  |
| $\alpha$ (°)       | 90      | 90      | 90      | 90      |
| $\beta$ (°)        | 90      | 90      | 90      | 90      |
| $\gamma$ (°)       | 90      | 90      | 90      | 90      |

## 5. SEM Images

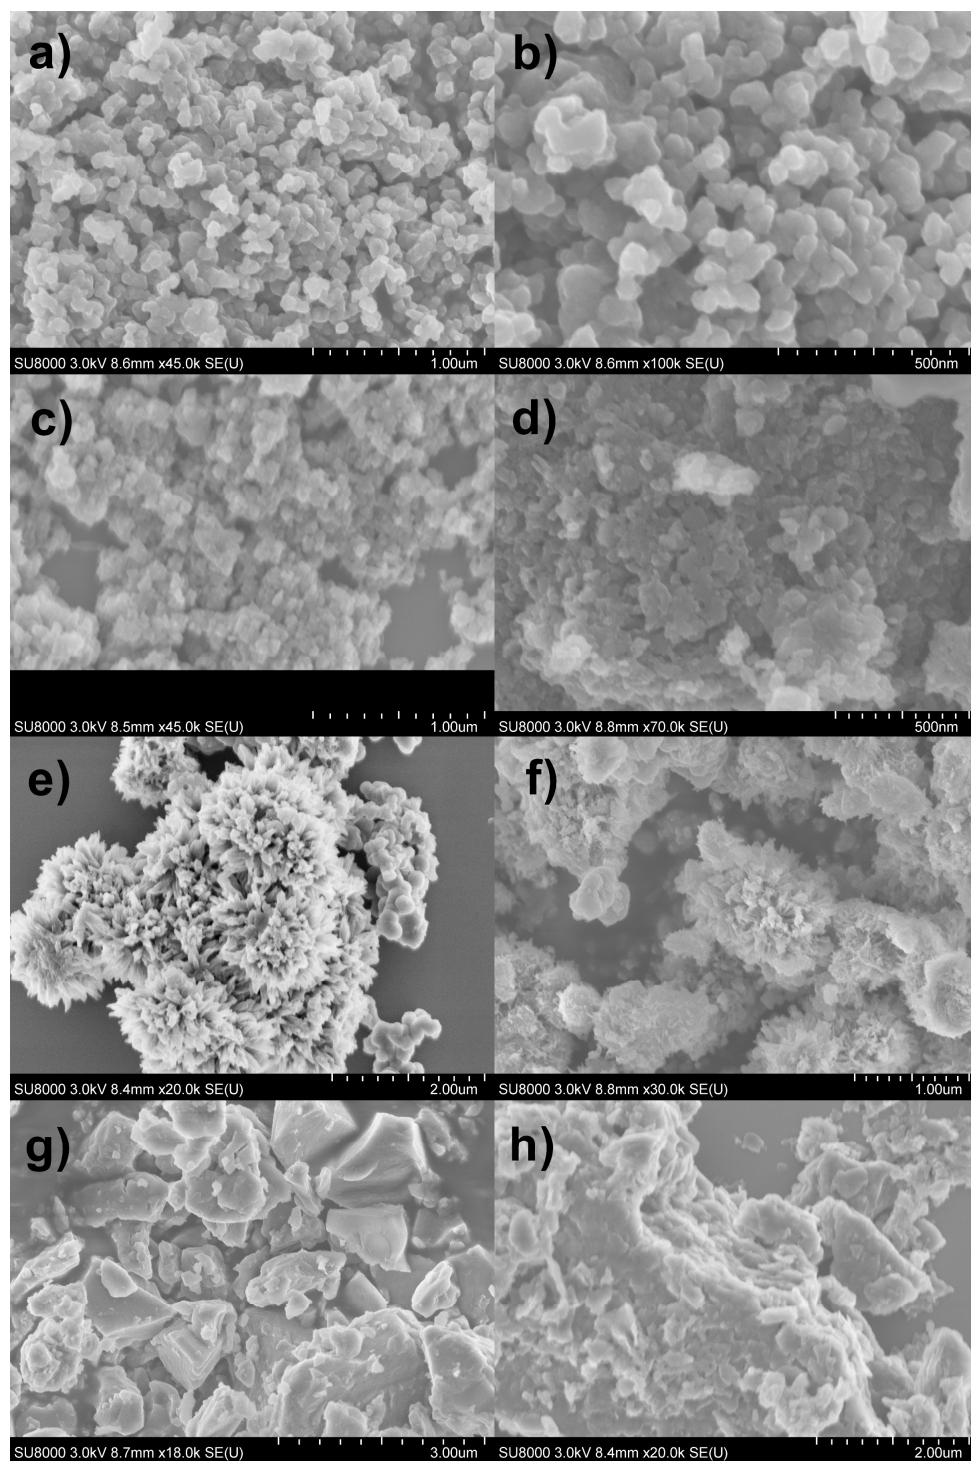

**Figure S5.** SEM images of NiPc-Ni (a, b), NiPc-Zn (c, d), ZnPc-Ni (e, f), ZnPc-Zn (g, h).

## 6. TEM Images

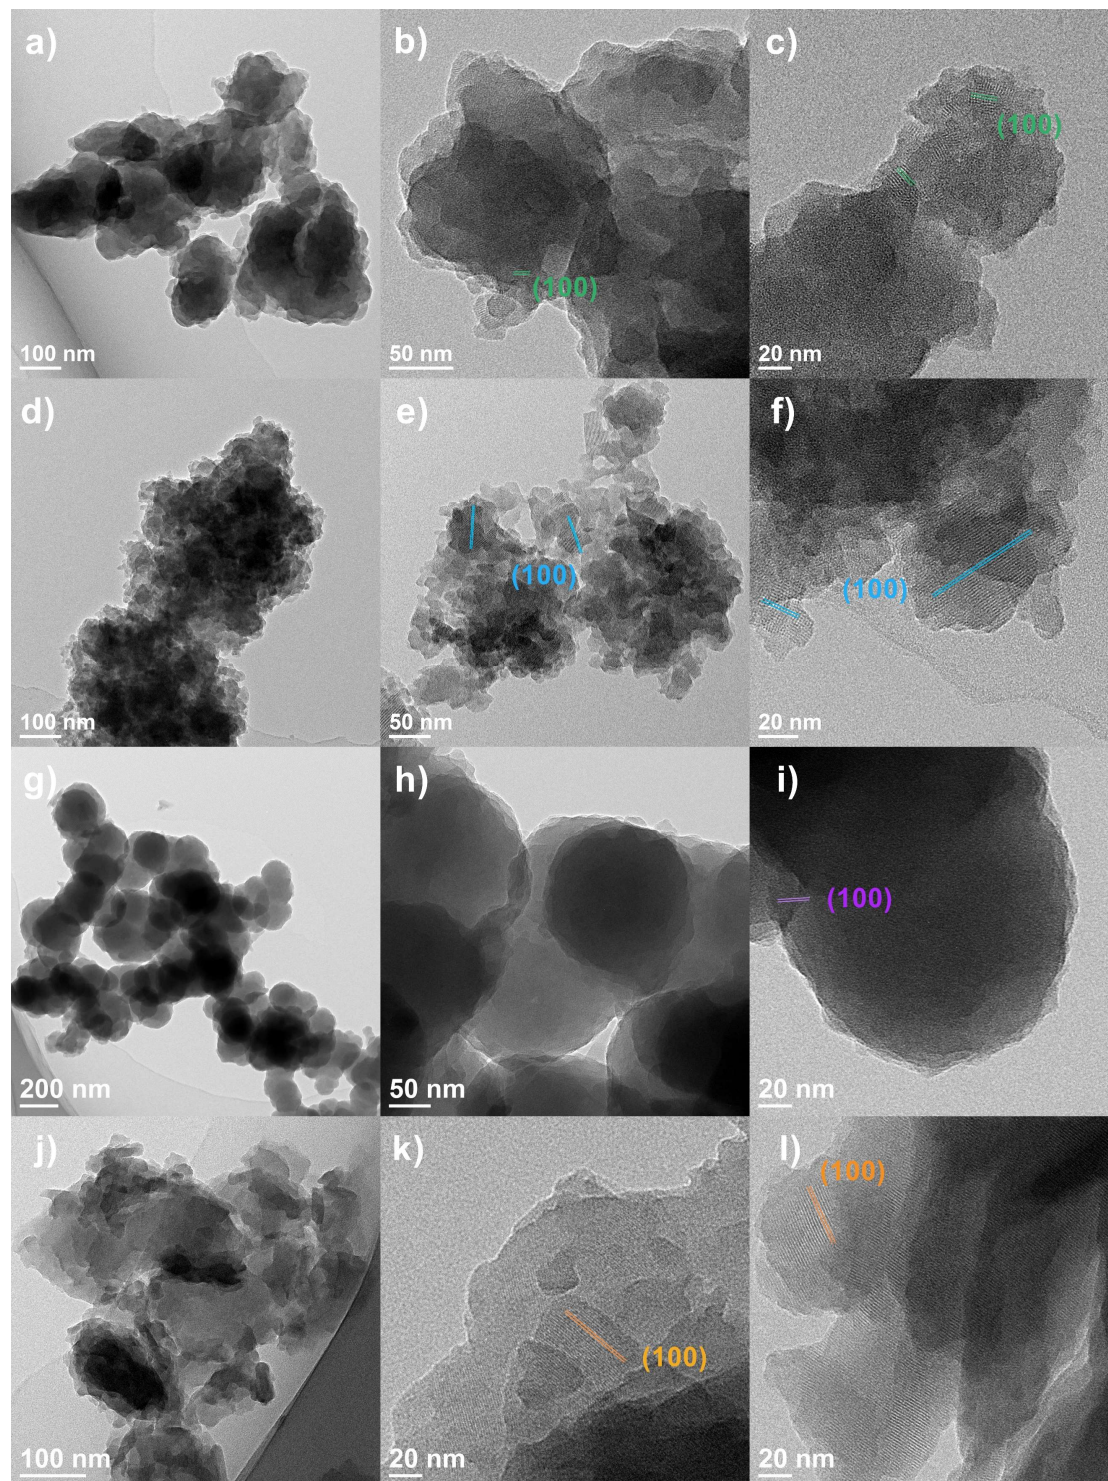

**Figure S6.** TEM images of NiPc-Ni (a-c), NiPc-Zn (d-f), ZnPc-Ni (g-i), ZnPc-Zn (j-l).

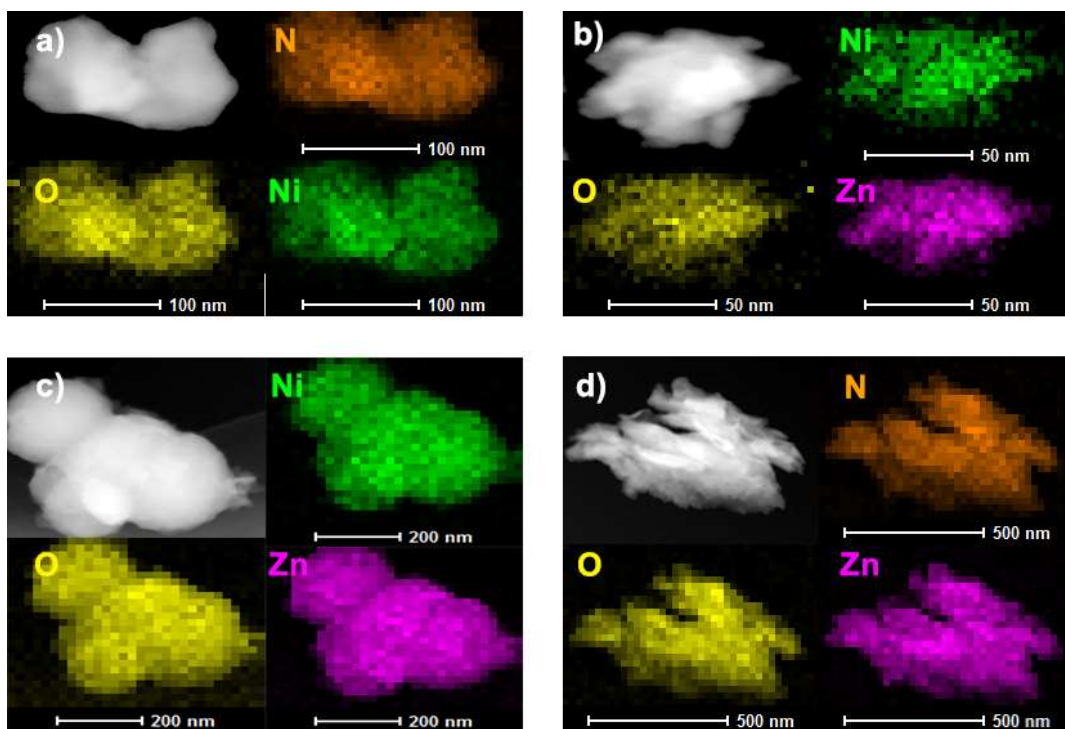

**Figure S7.** EDX mapping images of NiPc-Ni (a), NiPc-Zn (b), ZnPc-Ni (c), ZnPc-Zn (d).



## 7. XPS Spectra

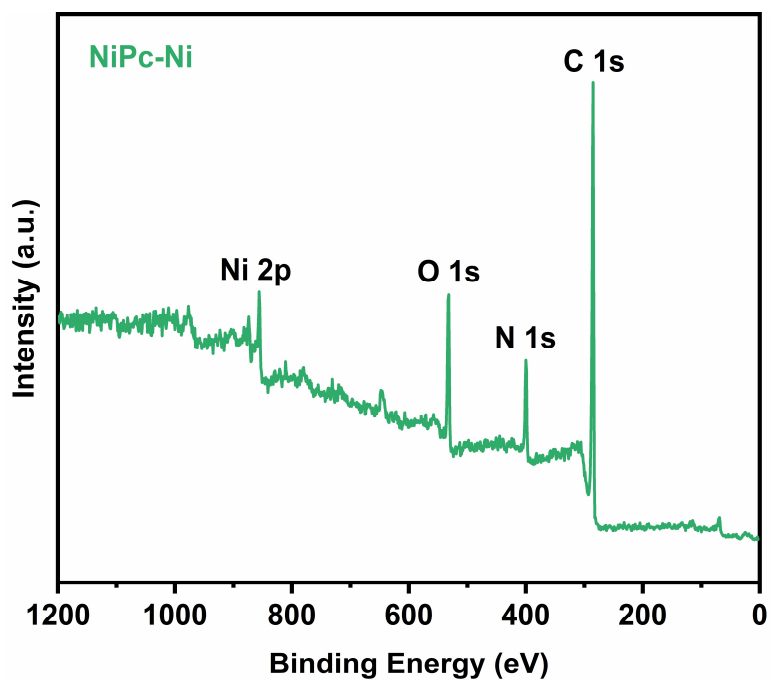

Figure S8. XPS survey spectra of NiPc-Ni

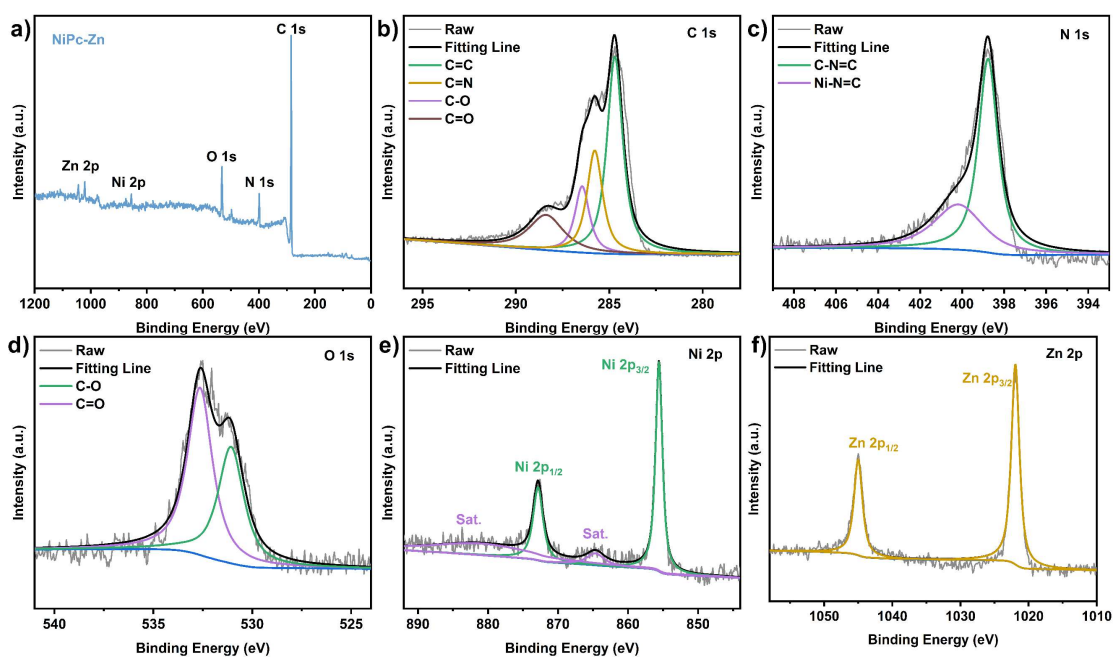

Figure S9. XPS spectra of NiPc-Zn: a) survey, b) C 1s, c) N 1s, d) O 1s, e) Ni 2p, f) Zn 2p. There is a integral ratio of 58:42 for C=O : C-O.

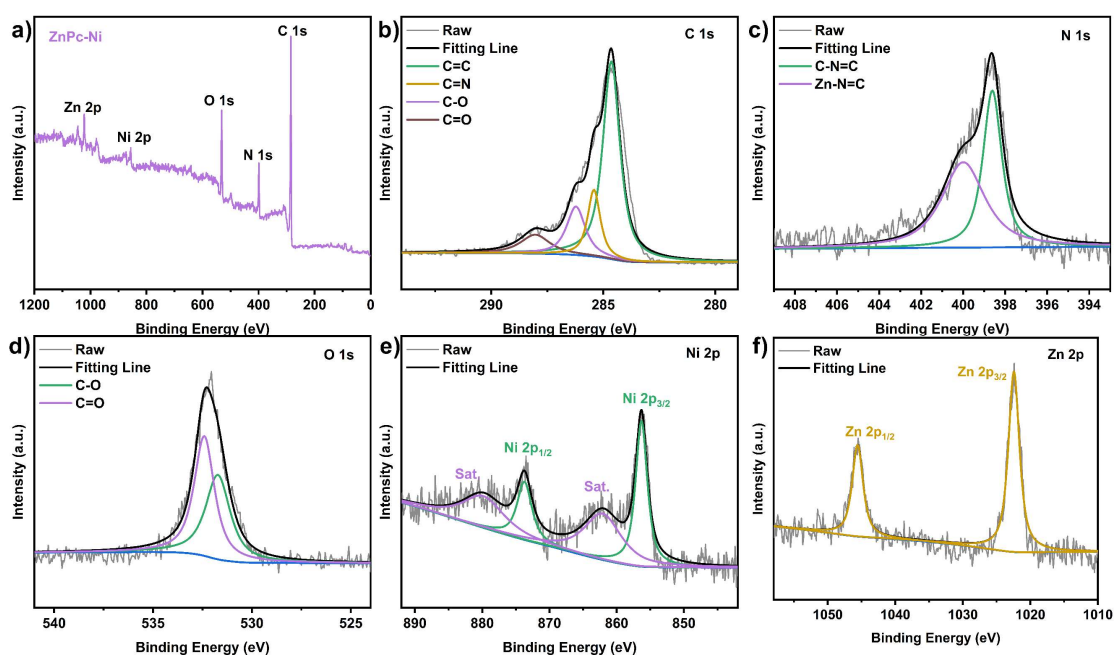

**Figure S10.** XPS spectra of **ZnPc-Ni**: a) survey, b) C 1s, c) N 1s, d) O 1s, e) Ni 2p, f) Zn 2p. There is a integral ratio of 54:46 for C=O : C-O.

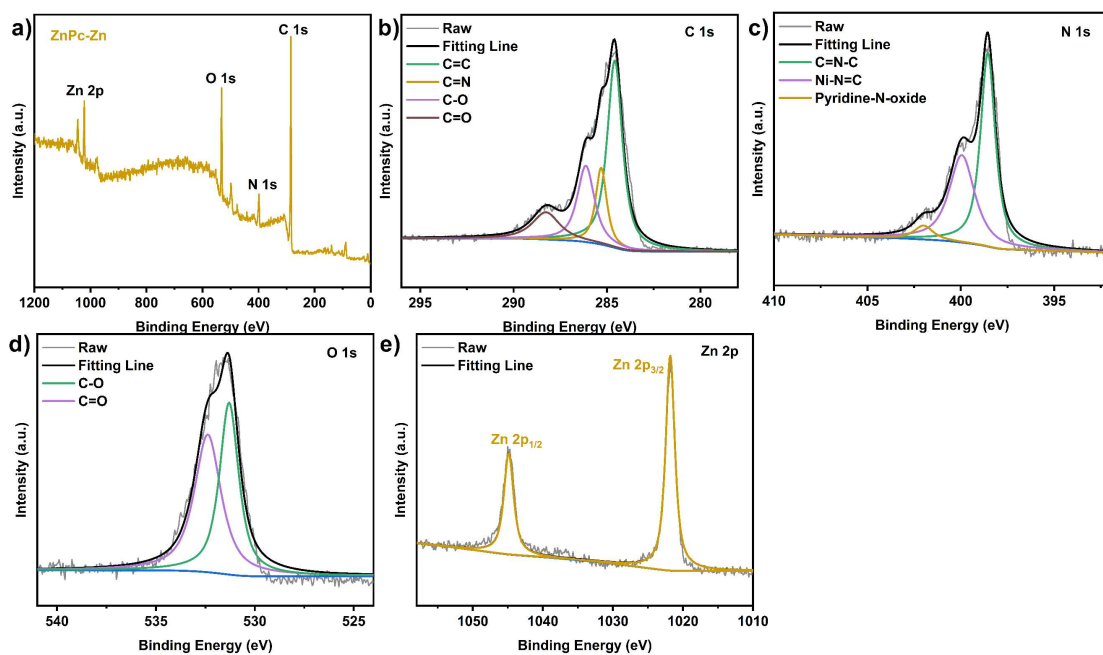

**Figure S11.** XPS spectra of **ZnPc-Zn**: a) survey, b) C 1s, c) N 1s, d) O 1s, e) Zn 2p. There is a integral ratio of 53:47 for C=O : C-O.

## 8. ECSA Measurements

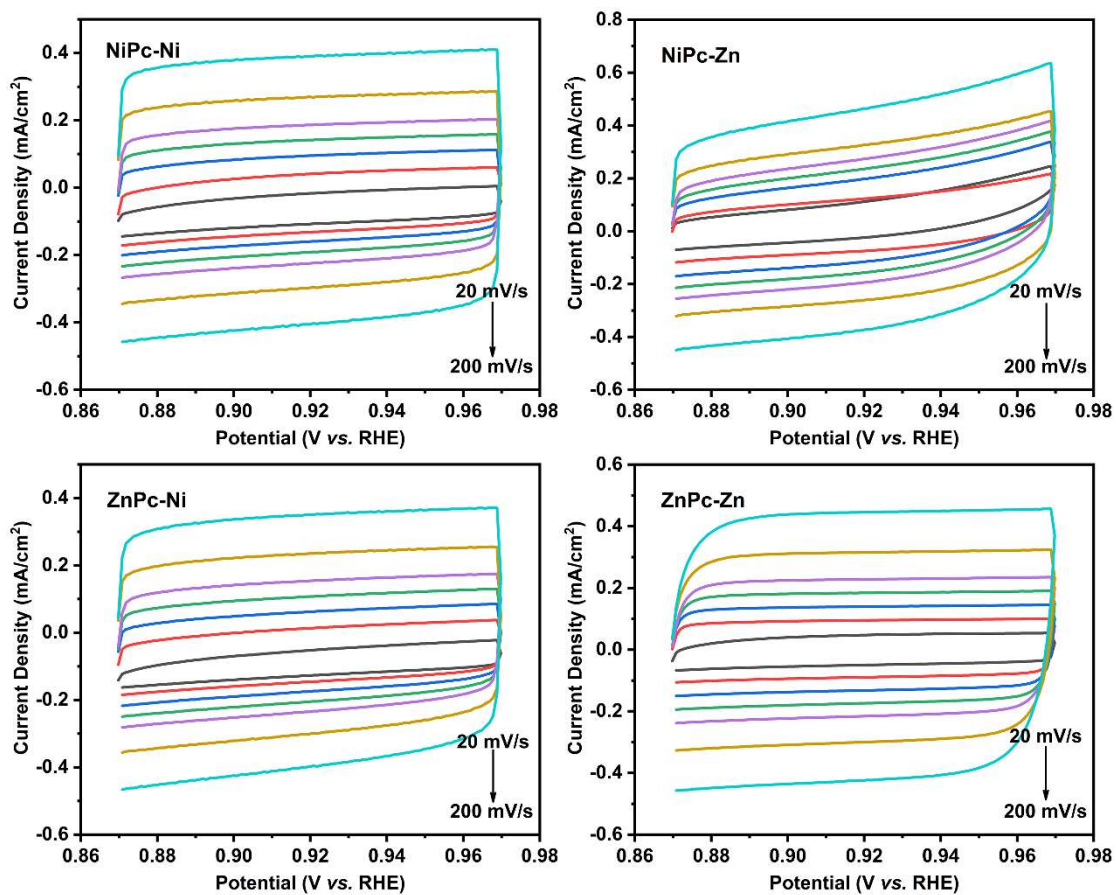

**Figure S12.** CVs in non-faradaic region of four MOFs.

## 9. TOF calculation

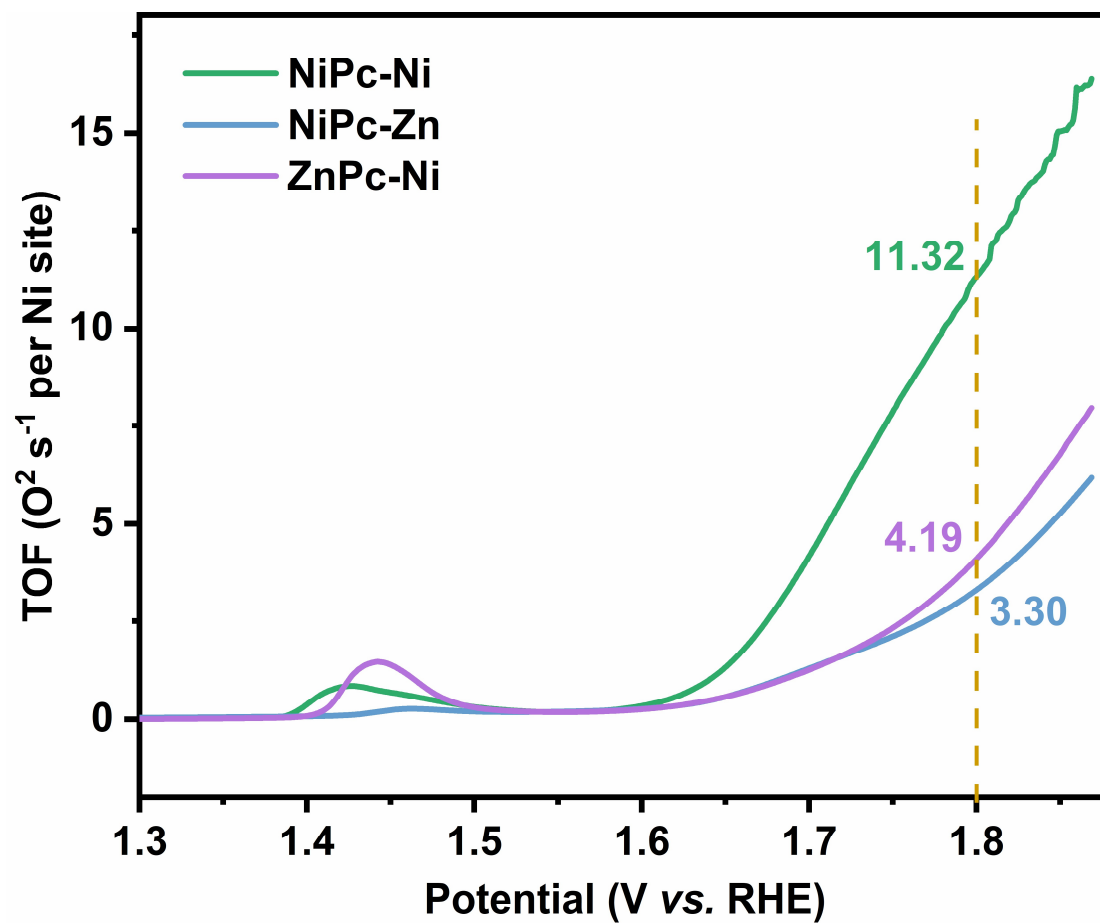

Figure S13. TOF of NiPc-Ni, NiPc-Zn and ZnPc-Ni based on LSV tests.

## 10. Band Structure Calculations

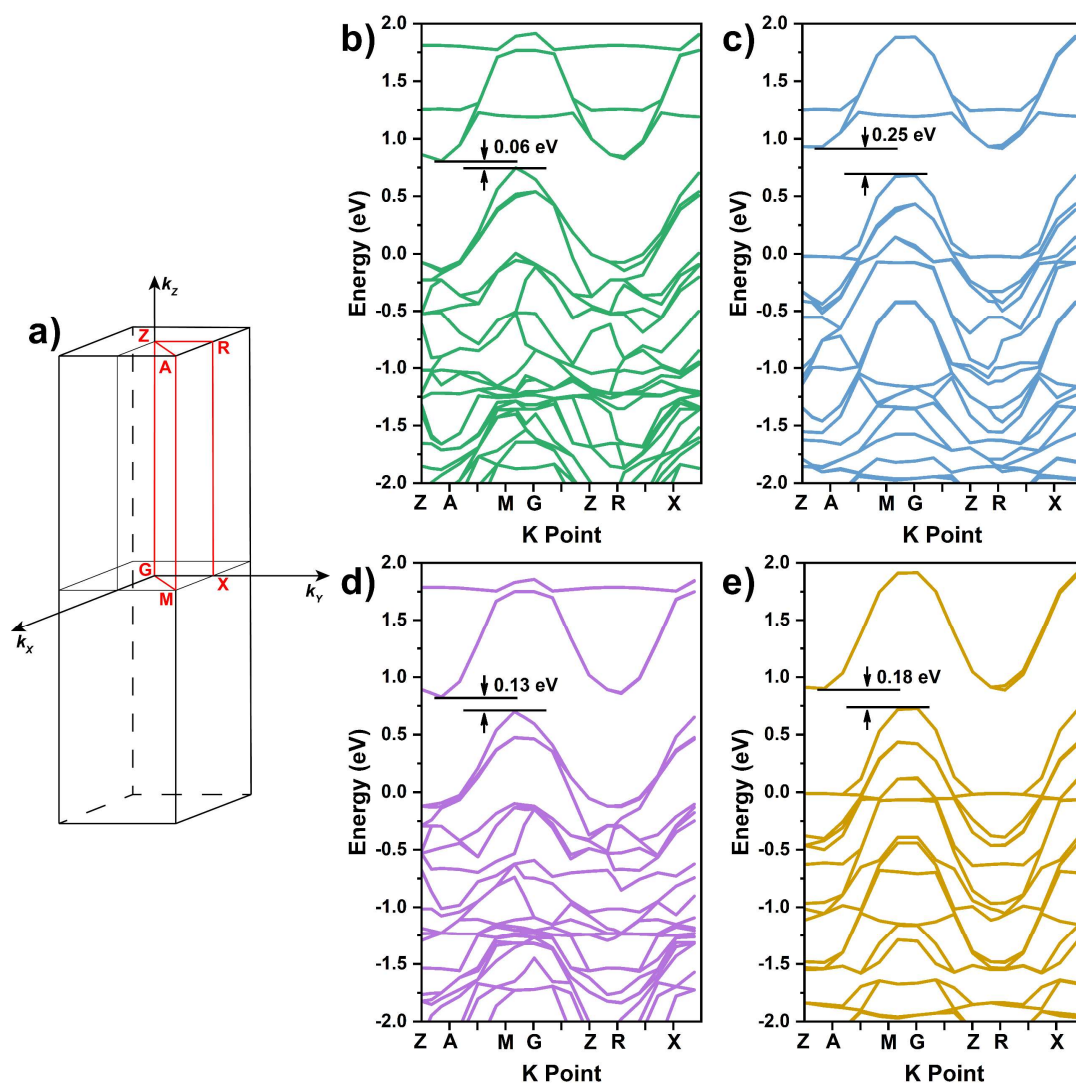

**Figure S14.** a) Brillouin zone and K-path selection for MOFs. b-e) Band structure and indirect band-gap of NiPc-Ni, NiPc-Zn, ZnPc-Ni, and ZnPc-Zn, respectively.

## 11. Stability Test

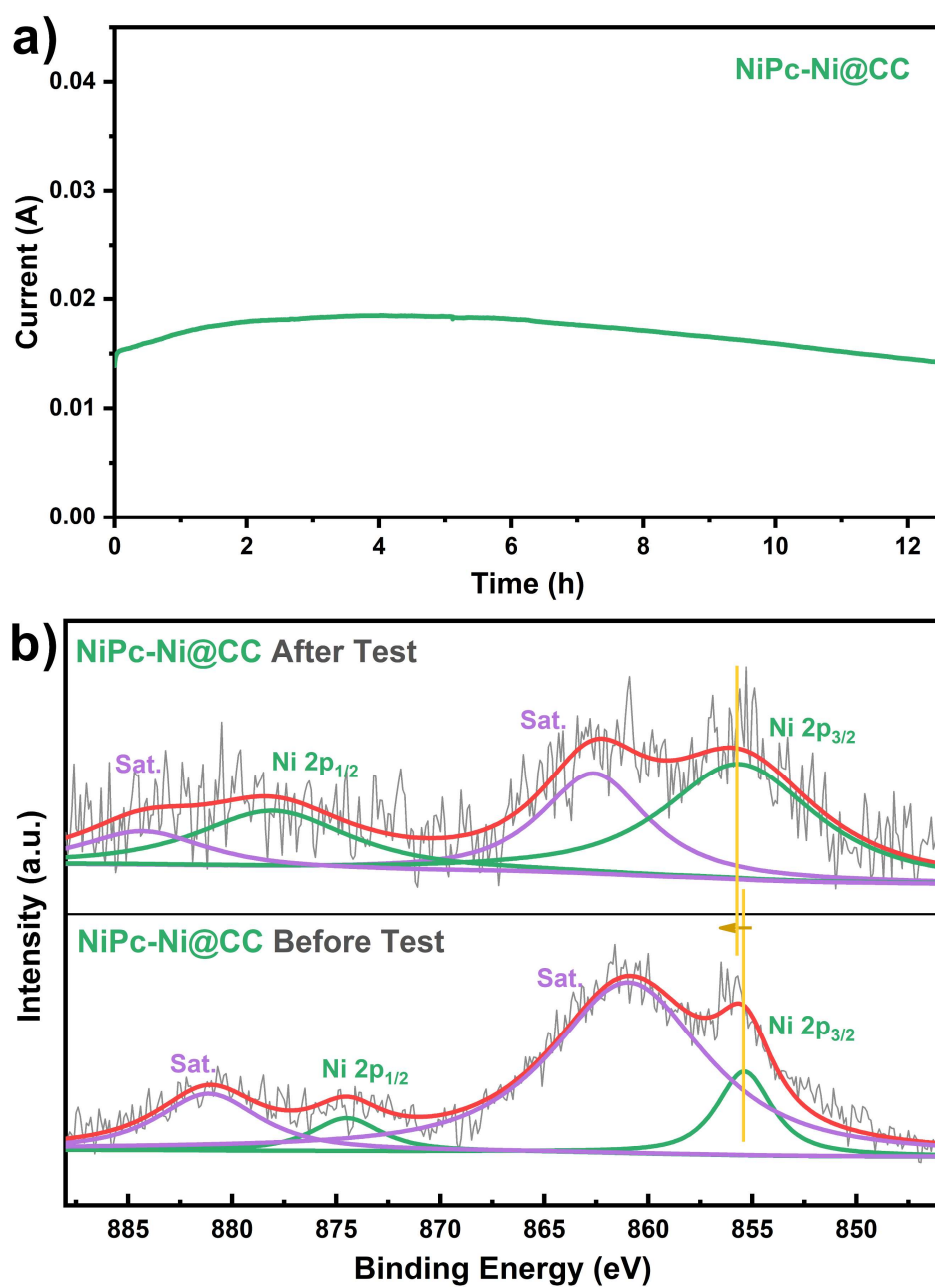

**Figure S15.** a) Chronoamperometry test of NiPc-Ni @Carbon Cloth. b) Ni 2p XPS spectra before and after chronoamperometry test.

## 12. Comparison Table

**Table S2.** Comparisons of the OER activity of MOF-based catalysts.

| Catalyst                                                | Electrolyte      | onset overpotential (mV) | overpotential @ j=10 mA/cm <sup>2</sup> (mV) | Tafel slope (mV/dec) | Substrate    | Ref.                                               |
|---------------------------------------------------------|------------------|--------------------------|----------------------------------------------|----------------------|--------------|----------------------------------------------------|
| <b>NiPc-Ni</b>                                          | <b>1.0 M KOH</b> | <b>319</b>               | <b>427</b>                                   | <b>83</b>            | <b>GC</b>    | <b>This work</b>                                   |
| Pb-TCPP                                                 | 1.0 M KOH        | -                        | 470                                          | 106.2                | GC           | Dalton Trans., 2016, 45, 61-65                     |
| ZIF-67                                                  | 1.0 M KOH        | 350                      | 550                                          | 316.9                | GC           | Nano Energy., 2017, 41, 417-425                    |
| UTSA-16                                                 | 1.0 M KOH        | 320                      | 408                                          | 77                   | GC           | ACS Appl. Mater. Interfaces, 2017, 9, 7193-7201    |
| Fe-MOF                                                  | 1.0 M KOH        | -                        | 443                                          | 74                   | GC           | J. Mater. Chem. A., 2020, 8, 3658-3666             |
| Ni-Cu(BDC)                                              | 1.0 M KOH        | -                        | 375                                          | 179.7                | GC           | New J. Chem., 2020, 44, 2459-2464                  |
| Ni <sub>5.7</sub> Ru <sub>0.3</sub> (HHTP) <sub>3</sub> | 0.1 M KOH        | 290                      | 390                                          | 61                   | GC           | Chem. Commun., 2020, 56, 13615-13618.              |
| Co-AIM NU-1000                                          | pH 11            | 400                      | -                                            | 90                   | FTO          | ACS Appl. Mater. Interfaces., 2015, 7, 28223-28230 |
| [Co <sub>3</sub> (HHTP) <sub>2</sub> ] <sub>n</sub>     | 0.1 M KOH        | 340                      | 490                                          | 83                   | FTO          | Chem. Commun., 2018, 54, 13579-13582               |
| NNU-23                                                  | 0.1 M KOH        | -                        | 365                                          | 81.8                 | Carbon Cloth | Angew. Chem. Int. Ed., 2018, 57, 9660-9664         |

## References:

- <sup>1</sup> J. Kibsgaard and T. F. Jaramillo, *Angew. Chem. Int. Ed.*, 2014, **53**, 14433-14437.
- <sup>2</sup> Z. Liu, Z. Zhao, Y. Wang, S. Dou, D. Yan, D. Liu, Z. Xia and S. Wang, *Adv. Mater.*, 2017, **29**, 1606207.
- <sup>3</sup> Z. Chen, Y. Song, J. Cai, X. Zheng, D. Han, Y. Wu, Y. Zang, S. Niu, Y. Liu, J. Zhu, X. Liu, and G. Wang, *Angew. Chem. Int. Ed.*, 2018, **57**, 5076.
- <sup>4</sup> Z. Chen, Y. Song, J. Cai, X. Zheng, D. Han, Y. Wu, Y. Zang, S. Niu, Y. Liu, J. Zhu, X. Liu and G. Wang, *Angew. Chem. Int. Ed.*, 2018, **57**, 5076.
